# Supplementary material for: Bioactivated Oxidized Polyvinyl Alcohol towards Next-Generation Nerve Conduits Development
Source: MDPI journal article supplement (doi:10.3390/polym13193372), 2021-09-30
Supplement: s1 [file s1]

Supplementary Material

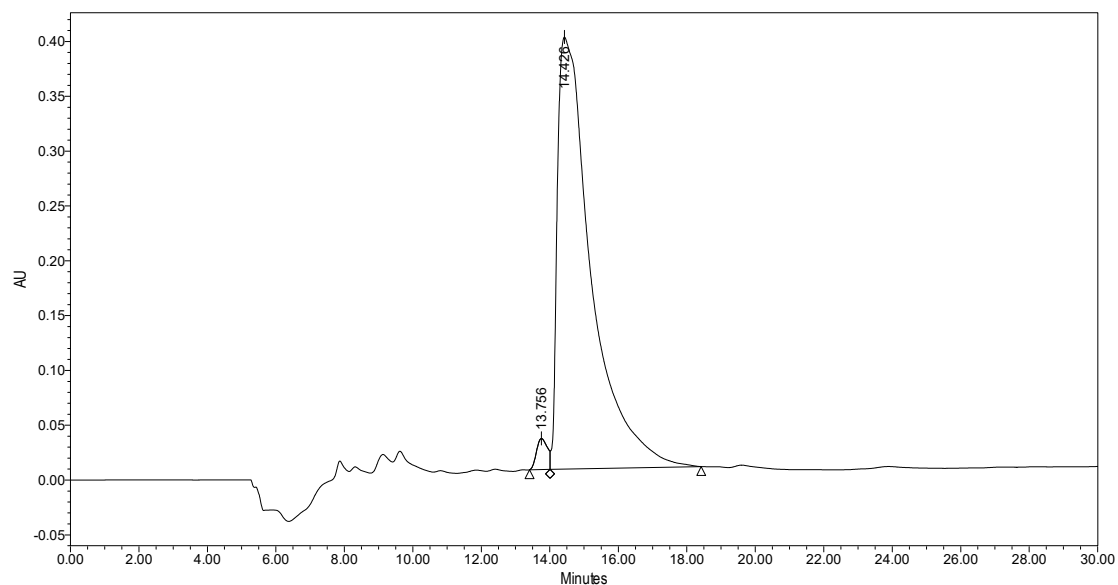

**Figure S1.** Analytical chromatogram of purified Aoa-xx-IKVAV obtained under the following conditions: column, Jupiter C<sub>18</sub> (5  $\mu$ m, 300 Å, 4.6 mm  $\times$  250 mm); injected volume, 200  $\mu$ L; flow rate, 0.5 mL/min; detector wavelength, 214 nm; eluent A, 0.05% TFA in MilliQ water; eluent B, 0.05% TFA in 2-propanol/water (40/60); gradient, from 40% to 55% of eluent B in 30 minutes.

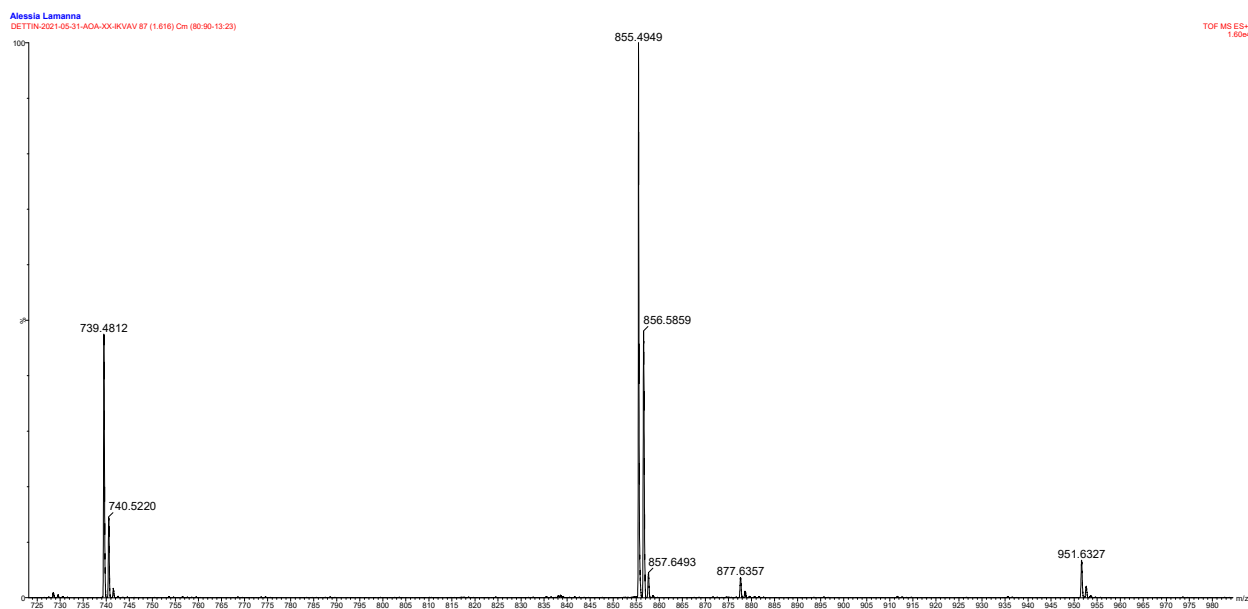

**Figure S2.** ESI-ToF mass spectrum of purified Aoa-xx-IKVAV. The mass analysis confirmed the presence of the target peptide (theoretical weight: 855.06 Da, experimental weight: 855.49 Da).

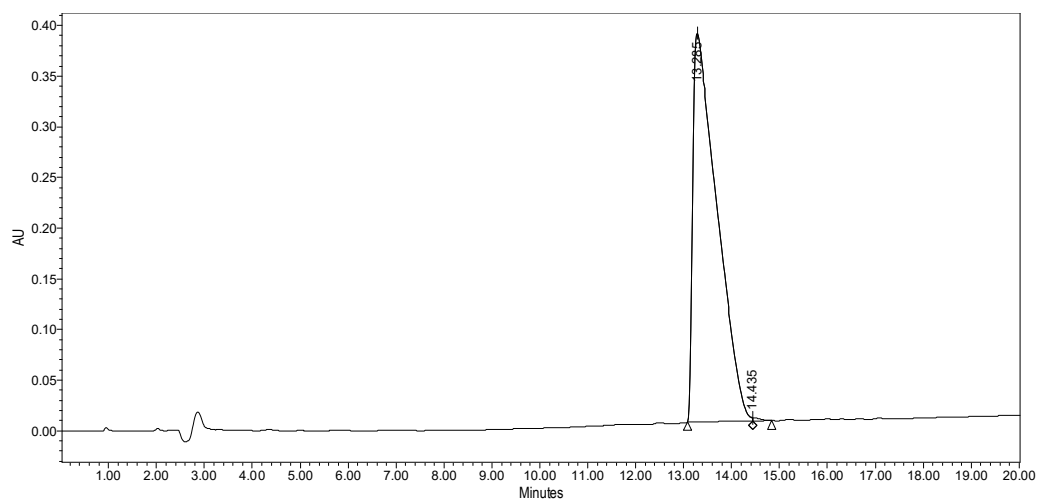

**Figure S3.** Analytical chromatogram of purified EAK obtained under the following conditions: column, NovaPak HR C<sub>18</sub> (4  $\mu$ m, 60 Å, 3.9 mm  $\times$  300 mm); injected volume, 150  $\mu$ L; flow rate, 1 mL/min; detector wavelength, 214 nm; eluent A, 0.05% TFA in MilliQ water; eluent B, 0.05% TFA in CH<sub>3</sub>CN; gradient, from 13% to 33% of eluent B in 20 minutes.

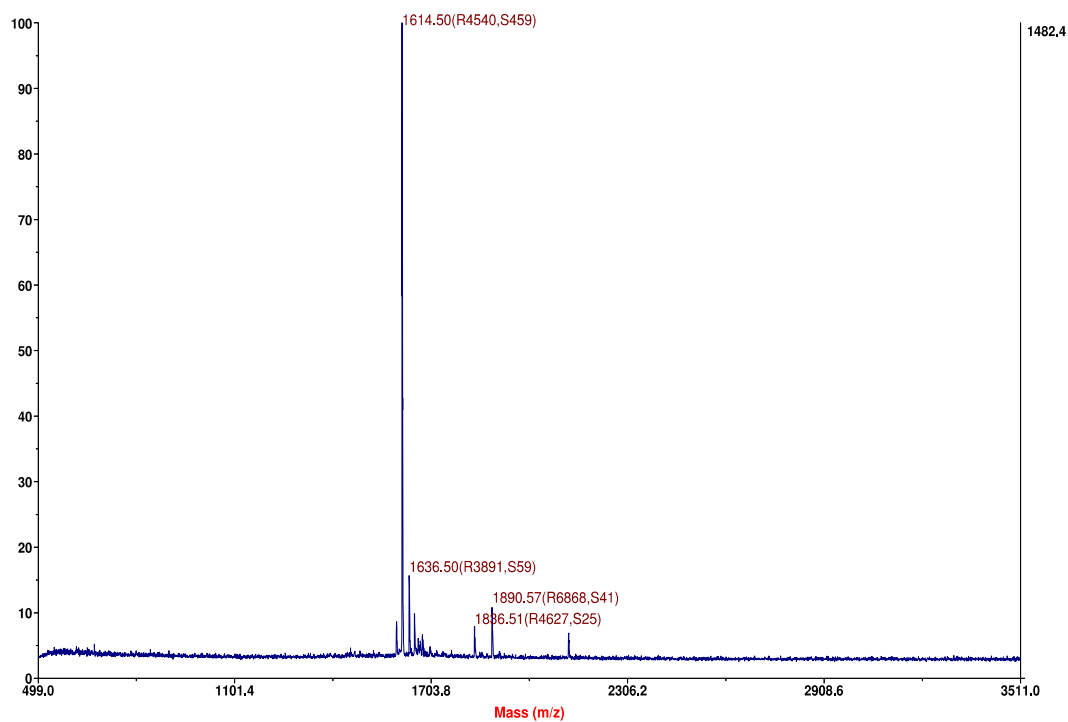

**Figure S4.** MALDI mass spectrum of purified EAK. The mass analysis confirmed the presence of the target peptide (theoretical weight: 1614.79 Da, experimental weight: 1614.50 Da).

**Table S1.** XPS results.

| Sample   | Signal      | Assignment       | BE (eV)          | FWHM (eV) | Atomic ratios (%) |
|----------|-------------|------------------|------------------|-----------|-------------------|
| PF-OxPVA | C1s         | C–C              | 285.0            | 1.53      | 54                |
|          |             | C–N              | 286.1            |           | 27                |
|          |             | C–O              | 287.5            |           | 11                |
|          |             | C=O              | 288.9            |           | 6                 |
|          |             | COOH             | 290.3            |           | 2                 |
|          | O1s         | C=O              | 531.0            | 2.05      | 53                |
|          |             | C–O              | 532.5            |           | 23                |
|          |             |                  | 533.5            |           | 19                |
|          |             | H <sub>2</sub> O | 535.0            |           | 5                 |
|          | OxPVA-IKVAV | C1s              | C–C              | 1.42      | 52                |
|          |             |                  | C–N              |           | 28                |
|          |             |                  | C–O              |           | 12                |
|          |             |                  | C=O              |           | 5                 |
|          |             |                  | COOH             |           | 3                 |
|          |             | O1s              | C=O              | 2.06      | 58                |
|          |             |                  | C–O              |           | 35                |
|          |             |                  | H <sub>2</sub> O |           | 7                 |
|          | N1s         | C–N              | 400.7            | 2.55      | 100               |
